# Supplementary material for: Low-Level Toxic Metal Exposure in Healthy Weaning-Age Infants: Association with Growth, Dietary Intake, and Iron Deficiency
Source: PubMed Central journal article supplement (PMC5409589; doi:10.3390/ijerph14040388), 2017-04-06

# Low-level toxic metal exposure in healthy weaning-age infants: association with growth, dietary intake, and iron deficiency

Jungil Choi, Ju Young Chang, Jeana Hong, Sue Shin, Jeong Su Park, Sohee Oh

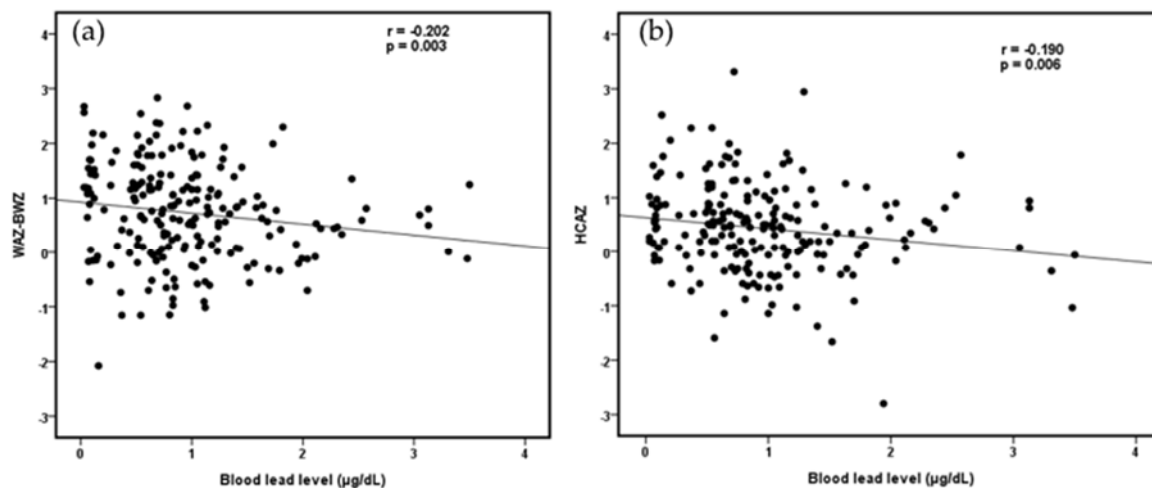

**Figure S1.** Correlation between blood lead levels and post-birth weight gain (WAZ-BWZ) (a), and head circumference for age Z scores (HCAZ) (b).

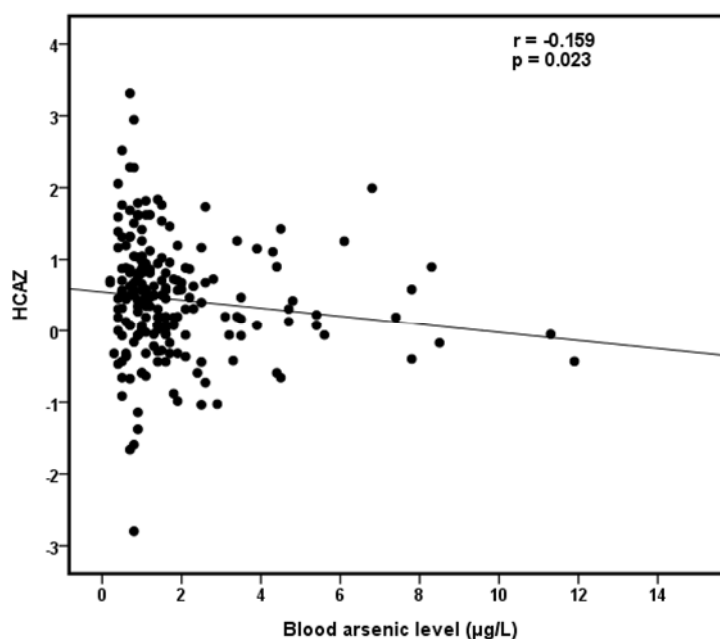

**Figure S2.** Correlation between blood arsenic levels and head circumference for age Z scores (HCAZ).

**Table S1.** Demographic, anthropometric, and diet-related parameters and iron status in two categories of infants according to the median values of blood cadmium levels.

| Characteristics                                  | Blood cadmium level ( $\mu\text{g/L}$ ) |                     |                   | <i>p</i> |
|--------------------------------------------------|-----------------------------------------|---------------------|-------------------|----------|
|                                                  | <0.05 (n=75)                            | $\geq$ 0.05 (n=135) | median (IQR)      |          |
| Age, months <sup>a</sup>                         | 10.9 (10.3, 11.7)                       | 11.5 (10.9, 12.3)   |                   | <0.001   |
| Sex, <i>n</i>                                    |                                         |                     |                   |          |
| Male                                             | 27                                      | 70                  | 0.06 (0.04, 0.10) | 0.027    |
| Female                                           | 48                                      | 65                  | 0.05 (0.03, 0.09) |          |
| Birth order                                      |                                         |                     |                   |          |
| First                                            | 56                                      | 101                 | 0.05 (0.04, 0.09) | 0.979    |
| $\geq$ Second                                    | 19                                      | 34                  | 0.06 (0.04, 0.10) |          |
| Mother's age at delivery                         |                                         |                     |                   |          |
| < 30 years                                       | 7                                       | 15                  | 0.05 (0.02, 0.10) | 0.687    |
| $\geq$ 30 years                                  | 68                                      | 120                 | 0.06 (0.04, 0.09) |          |
| Gestational age, weeks <sup>a</sup>              | 39.0 (38.2, 40.0)                       | 39.0 (38.0, 40.0)   |                   | 0.161    |
| Type of birth, <i>n</i>                          |                                         |                     |                   |          |
| Vaginal delivery                                 | 51                                      | 97                  | 0.05 (0.04, 0.09) | 0.558    |
| Surgical delivery                                | 24                                      | 38                  | 0.06 (0.04, 0.09) |          |
| Anthropometry, <i>Z</i> -score <sup>b</sup>      |                                         |                     |                   |          |
| birthweight, kg <sup>a</sup>                     | 3.24 (3.0, 3.54)                        | 3.24 (3.02, 3.47)   |                   | 0.224    |
| birthweight                                      | 0.129 $\pm$ 0.820                       | -0.130 $\pm$ 0.676  |                   | 0.199    |
| weight for age                                   | 0.665 $\pm$ 0.841                       | 0.648 $\pm$ 0.816   |                   | 0.891    |
| WAZ - BWZ                                        | 0.652 $\pm$ 0.880                       | 0.789 $\pm$ 0.894   |                   | 0.321    |
| height for age                                   | 0.513 $\pm$ 1.012                       | 0.545 $\pm$ 1.141   |                   | 0.321    |
| HC at birth, cm <sup>a,c</sup>                   | 34.0 (33.0, 35.0)                       | 34.0 (33.5, 35.0)   |                   | 0.330    |
| HC at birth <sup>c</sup>                         | -0.04 $\pm$ 0.85                        | 0.13 $\pm$ 0.92     |                   | 0.366    |
| HCAZ                                             | 0.465 $\pm$ 0.891                       | 0.420 $\pm$ 0.790   |                   | 0.714    |
| Post-birth growth of HC <sup>c,d</sup>           | 0.33 $\pm$ 1.61                         | 0.27 $\pm$ 0.13     |                   | 0.770    |
| Feeding type, <i>n</i>                           |                                         |                     |                   |          |
| exclusively/mostly breastfed                     | 17                                      | 78                  | 0.06 (0.05, 0.10) | <0.001   |
| mixed fed                                        | 26                                      | 23                  | 0.04 (0.03, 0.08) |          |
| mostly formula fed                               | 32                                      | 34                  | 0.05 (0.03, 0.07) |          |
| Duration of breastfeeding, months <sup>a</sup>   | 6.0 (3.0, 10.3)                         | 10.4 (6.0, 11.7)    |                   | <0.001   |
| Duration of CF intake, months <sup>a</sup>       | 5.0 (4.0, 6.0)                          | 6.0 (5.0, 7.0)      |                   | 0.030    |
| Adequacy of rice-based food intake, <i>n</i>     |                                         |                     |                   |          |
| Adequate                                         | 55                                      | 108                 | 0.06 (0.04, 0.10) | 0.267    |
| Poor                                             | 20                                      | 27                  | 0.05 (0.03, 0.07) |          |
| Duration of red meat intake, months <sup>a</sup> | 5.0 (3.0, 6.0)                          | 5.0 (4.0, 6.0)      |                   | 0.001    |
| Adequacy of red meat intake, <i>n</i>            |                                         |                     |                   |          |
| Adequate                                         | 57                                      | 109                 | 0.06 (0.04, 0.10) | 0.419    |

|                                                     |                |                |                   |       |
|-----------------------------------------------------|----------------|----------------|-------------------|-------|
| Poor                                                | 18             | 26             | 0.05, 0.03, 0.07) |       |
| Regular fish intake, <i>n</i>                       |                |                |                   |       |
| Presence                                            | 43             | 78             | 0.05 (0.04, 0.10) | 0.950 |
| Absence                                             | 32             | 57             | 0.05 (0.04, 0.08) |       |
| Duration of fish intake, <i>months</i> <sup>a</sup> | 1.0 (0.0, 3.0) | 1.0 (0.0, 3.0) |                   | 0.459 |
| Iron status, <i>n</i>                               |                |                |                   |       |
| Deficiency                                          | 8              | 36             | 0.07 (0.05, 0.10) | 0.006 |
| No deficiency                                       | 67             | 99             | 0.05 (0.03, 0.08) |       |
| Iron deficiency anemia                              | 4              | 14             | 0.06 (0.05, 0.08) | 0.212 |
| Mother's smoking before pregnancy                   |                |                |                   |       |
| No                                                  | 72             | 130            | 0.06 (0.02, 0.08) | 0.914 |
| Yes                                                 | 3              | 5              | 0.05 (0.04, 0.10) |       |
| Father's indoor smoking                             |                |                |                   |       |
| No                                                  | 55             | 109            | 0.05 (0.03, 0.07) | 0.214 |
| Yes                                                 | 20             | 26             | 0.06 (0.04, 0.10) |       |

*P* values were calculated using the chi-square test unless stated otherwise. <sup>a</sup>The values are presented as the median and interquartile range. The comparisons according to blood Cd levels were performed using the Mann-Whitney's test. <sup>b</sup>The values are presented as the mean and standard deviation (95% confidence interval). The comparisons according to blood Cd levels were performed using the independent samples t test. <sup>c</sup>The measurements were evaluated in 112 infants whose parents provided their babies' records for head circumference at birth or whose electronic medical records at birth were available; <sup>d</sup>The values were calculated as the difference in the current head circumference Z scores minus the head circumference Z scores at birth. WAZ-BWZ: The difference of the weight percentiles between the time of the study and birth; HCAZ: head circumference for age Z scores

**Table S2.** Demographic, anthropometric, and diet-related parameters and iron status in two categories of infants according to the median values of blood lead levels.

| Characteristics                                  | Blood lead level ( $\mu\text{g/dL}$ ) |                     |                   | <i>p</i> |
|--------------------------------------------------|---------------------------------------|---------------------|-------------------|----------|
|                                                  | <0.83 (n=75)                          | $\geq$ 0.83 (n=135) | median (IQR)      |          |
| Age, months <sup>a</sup>                         | 11.2 (10.4, 12.0)                     | 11.4 (10.7, 12.0)   |                   | 0.203    |
| Sex, <i>n</i>                                    |                                       |                     |                   |          |
| Male                                             | 44                                    | 53                  | 0.84 (0.56, 1.27) | 0.322    |
| Female                                           | 59                                    | 54                  | 0.73 (0.50, 1.20) |          |
| Birth order                                      |                                       |                     |                   |          |
| First                                            | 79                                    | 78                  | 0.82 (0.52, 1.16) | 0.526    |
| $\geq$ Second                                    | 24                                    | 29                  | 0.89 (0.63, 1.66) |          |
| Mother's age at delivery                         |                                       |                     |                   |          |
| < 30 years                                       | 10                                    | 12                  | 0.95 (0.32, 1.16) | 0.722    |
| $\geq$ 30 years                                  | 93                                    | 95                  | 0.83 (0.54, 1.24) |          |
| Gestational age, weeks <sup>a</sup>              | 39.0 (38.0, 40.0)                     | 39.3 (38.1, 40.0)   |                   | 0.094    |
| Type of birth, <i>n</i>                          |                                       |                     |                   |          |
| Vaginal delivery                                 | 70                                    | 78                  | 0.85 (0.54, 1.24) | 0.433    |
| Surgical delivery                                | 33                                    | 29                  | 0.73 (0.50, 1.14) |          |
| Anthropometry, Z-scores <sup>b</sup>             |                                       |                     |                   |          |
| Birthweight, kg <sup>a</sup>                     | 3.24 (3.0, 3.48)                      | 3.24 (3.04, 3.49)   |                   | 0.403    |
| Birthweight for age                              | -0.084 0.796                          | -0.075 0.669        |                   | 0.925    |
| Weight for age                                   | 0.774 $\pm$ 0.860                     | 0.540 $\pm$ 0.771   |                   | 0.039    |
| WAZ - BWZ                                        | 0.858 $\pm$ 0.962                     | 0.614 $\pm$ 0.793   |                   | 0.047    |
| Height for age                                   | 0.626 $\pm$ 1.060                     | 0.444 $\pm$ 1.125   |                   | 0.227    |
| HC at birth, cm <sup>a,c</sup>                   | 34.0 (33.5, 35.0)                     | 34.3 (33.5, 35.0)   |                   | 0.871    |
| HC at birth <sup>c</sup>                         | 0.04 $\pm$ 0.95                       | 0.10 $\pm$ 0.86     |                   | 0.751    |
| HCAZ                                             | 0.609 $\pm$ 0.813                     | 0.270 $\pm$ 0.806   |                   | 0.003    |
| Post-birth growth of HC <sup>c,d</sup>           | 0.509 $\pm$ 1.19                      | 0.096 $\pm$ 1.24    |                   | 0.064    |
| Feeding type, <i>n</i>                           |                                       |                     |                   |          |
| exclusively/mostly breastfed                     | 27                                    | 68                  | 1.12 (0.77, 1.63) | <0.001   |
| mixed fed                                        | 26                                    | 23                  | 0.81 (0.51, 1.11) |          |
| mostly formula fed                               | 50                                    | 16                  | 0.62 (0.39, 0.82) |          |
| Duration of breastfeeding, months <sup>a</sup>   | 6.0 (3.0, 10.1)                       | 10.9 (9.2, 11.5)    |                   | <0.001   |
| Duration of CF intake, months <sup>a</sup>       | 6.0 (5.0, 6.0)                        | 5.0 (5.0, 6.0)      |                   | 0.459    |
| Adequacy of rice-based food intake, <i>n</i>     |                                       |                     |                   |          |
| Adequate                                         | 87                                    | 76                  | 0.74 (0.51, 1.12) | 0.020    |
| Poor                                             | 16                                    | 31                  | 1.06 (0.77, 1.58) |          |
| Duration of red meat intake, months <sup>a</sup> | 5.0 (4.0, 6.0)                        | 5.0 (4.0, 6.0)      |                   | 0.152    |
| Adequacy of red meat intake, <i>n</i>            |                                       |                     |                   |          |
| Adequate                                         | 88                                    | 78                  | 0.75 (0.51, 1.14) | 0.026    |

|                                                     |                |                |                   |        |
|-----------------------------------------------------|----------------|----------------|-------------------|--------|
| Poor                                                | 15             | 29             | 1.04 (0.77, 1.53) |        |
| Regular fish intake, <i>n</i>                       |                |                |                   |        |
| Presence                                            | 66             | 55             | 0.74 (0.51, 1.20) | 0.063  |
| Absence                                             | 37             | 52             | 0.97 (0.59, 1.27) |        |
| Duration of fish intake, <i>months</i> <sup>a</sup> | 2.0 (0.0, 4.0) | 0.0 (0.0, 2.0) |                   |        |
| Iron status, <i>n</i>                               |                |                |                   |        |
| Deficiency                                          | 10             | 34             | 1.24 (0.84, 1.64) | <0.001 |
| No deficiency                                       | 93             | 73             | 0.75 (0.51, 1.10) |        |
| Iron deficiency anemia                              | 1              | 17             | 1.44 (1.14, 1.80) | <0.001 |
| Mother's smoking before pregnancy                   |                |                |                   |        |
| No                                                  | 98             | 104            | 0.76 (0.64, 1.12) | 0.438  |
| Yes                                                 | 5              | 3              | 0.83 (0.52, 1.24) |        |
| Father's indoor smoking                             |                |                |                   |        |
| No                                                  | 88             | 15             | 0.75 (0.47, 1.15) | 0.012  |
| Yes                                                 | 76             | 31             | 1.04 (0.72, 1.52) |        |

*P* values were calculated using the chi-square test unless stated otherwise. <sup>a</sup> The values are presented as the median and interquartile range. The comparisons according to blood Cd levels were performed using the Mann-Whitney's test. <sup>b</sup>The values are presented as the mean and standard deviation (95% confidence interval). The comparisons according to blood Cd levels were performed using the independent samples t test. <sup>c</sup>The measurements were evaluated in 112 infants whose parents provided their babies' records for head circumference at birth or whose electronic medical records at birth were available; <sup>d</sup>The values were calculated as the difference in the current head circumference Z scores minus the head circumference Z scores at birth. WAZ-BWZ: The difference of the weight percentiles between the time of the study and birth; HCAZ: head circumference for age Z scores

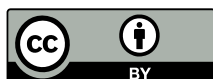

Supplement: ijerph-14-00388-s001.pdf [file ijerph-14-00388-s001.pdf]
